# Supplementary material for: Association of the Lung Immune Prognostic Index with Immunotherapy Outcomes in Mismatch Repair Deficient Tumors
Source: MDPI journal article supplement (doi:10.3390/cancers13153776), 2021-07-27
Supplement: s1 [file s1]

## Article

# Association of the Lung Immune Prognostic Index with Immunotherapy Outcomes in Mismatch Repair Deficient Tumors

Edouard Auclin, Perrine Vuagnat, Cristina Smolenschi, Julien Taieb, Jorge Adeva, Laetitia Nebot-Bral, Marta Garcia de Herreros, Rosario Vidal Tocino, Federico Longo-Muñoz, Yola El Dakdouki, Patricia Martín-Romano, Lydia Gaba, Tamara Saurí, Helena Oliveres, Eduardo Castañón, Rocío Garcia-Carbonero, Benjamin Besse, Christophe Massard, Laura Mezquita and Antoine Hollebecque

**Table S1.** Clinical, pathological and biological characteristics of the population according to LIPI group ( $n = 143$ ).

|                                 |                  | LIPI Good prognostic group<br>(N = 67) | LIPI Intermediate prognostic group<br>(N = 62) | LIPI Poor prognostic group<br>(N = 14) | <i>p</i> value |
|---------------------------------|------------------|----------------------------------------|------------------------------------------------|----------------------------------------|----------------|
| Age (years)                     | Median (IQR)     | 65 (52.5;69.5)                         | 59.5 (49;70)                                   | 67 (62.5;71.5)                         | 0.26           |
|                                 | > 65             | 30 (46.2%)                             | 23 (37.1%)                                     | 8 (57.1%)                              | 0.32           |
|                                 | Missing          | 2                                      | 0                                              | 0                                      |                |
| Gender                          | Female           | 35 (52.2%)                             | 39 (62.9%)                                     | 8 (57.1%)                              | 0.47           |
|                                 | Male             | 32 (47.8%)                             | 23 (37.1%)                                     | 6 (42.9%)                              |                |
| Primary tumor site              | Gastrointestinal | 53 (79.1%)                             | 37 (59.7%)                                     | 6 (42.8%)                              | 0.02           |
|                                 | Gynecologic      | 9 (13.4%)                              | 15 (24.2%)                                     | 4 (28.6%)                              |                |
|                                 | Other            | 5 (7.5%)                               | 10 (16.1%)                                     | 4 (28.6%)                              |                |
| Lynch syndrome                  | Yes              | 20 (38.5%)                             | 16 (29.6%)                                     | 3 (27.3%)                              | 0.63           |
|                                 | Missing          | 15                                     | 8                                              | 3                                      |                |
| Synchronous metastasis          | Yes              | 23 (34.8%)                             | 26 (41.9%)                                     | 5 (35.7%)                              | 0.70           |
|                                 | Missing          | 1                                      | 0                                              | 0                                      |                |
| Line of ICI start               | Median (IQR)     | 2 (2;3)                                | 2 (2;3)                                        | 2 (2;3)                                | 0.91           |
|                                 | > 2              | 31 (46.3%)                             | 25 (40.3%)                                     | 4 (30.8%)                              | 0.55           |
|                                 | Missing          | 0                                      | 0                                              | 1                                      |                |
| N metastasis at ICI start       |                  |                                        |                                                |                                        |                |
|                                 | > 2              | 11 (17.5%)                             | 16 (26.7%)                                     | 6 (42.9%)                              | 0.11           |
|                                 | Missing          | 4                                      | 2                                              | 0                                      |                |
| Lung metastasis                 | Yes              | 9 (13.4%)                              | 14 (22.6%)                                     | 6 (42.9%)                              | 0.04           |
| Bone metastasis                 | Yes              | 2 (3.0%)                               | 6 (9.7%)                                       | 4 (28.6%)                              | 0.01           |
| Liver metastasis                | Yes              | 17 (25.4%)                             | 23 (37.1%)                                     | 7 (50.0%)                              | 0.13           |
| Brain metastasis                | Yes              | 0 (0%)                                 | 5 (8.1%)                                       | 2 (14.3%)                              | 0.001          |
| Type of ICI antibody            | PD-1             | 43 (64.2%)                             | 50 (80.6%)                                     | 9 (64.3%)                              | 0.12           |
|                                 | PD-L1            | 24 (35.8%)                             | 12 (19.4%)                                     | 5 (35.7%)                              |                |
| Monotherapy or combination      | Combination      | 14 (20.9%)                             | 4 (6.5%)                                       | 1 (7.1%)                               | 0.05           |
|                                 | Monotherapy      | 53 (79.1%)                             | 58 (93.5%)                                     | 13 (92.9%)                             |                |
| Performance status at ICI start | 0                | 33 (55.9%)                             | 23 (38.3%)                                     | 1 (8.3%)                               | 0.004          |

|               |         |             |            |            |         |
|---------------|---------|-------------|------------|------------|---------|
|               | ≥1      | 26 (44.01%) | 37 (61.7%) | 11 (91.7%) |         |
|               | Missing | 8           | 2          | 2          |         |
| dNLR          | > 3     | 0 (0%)      | 21 (33.9%) | 14 (100%)  | <0.0001 |
| LDH           | High    | 0 (0%)      | 41 (66.1%) | 14 (100%)  | <0.001  |
|               | Missing | 0           | 0          | 0          |         |
| Albumin (g/L) | ≤ 35    | 18 (26.9%)  | 33 (54.1%) | 10 (71.4%) | 0.001   |
|               | Missing | 0           | 1          | 0          |         |

ICI: immune checkpoint inhibitors, dNLR: derived neutrophils to leukocytes ratio, LDH: lactate dehydrogenase, LIPI: lung immune prognostic index.

**Table S2.** detailed tumor types according to LIPI group ( $n = 143$ ).

| Tumor site                 | Whole sample | Good        | Intermediate | Poor       |
|----------------------------|--------------|-------------|--------------|------------|
|                            | (N = 151)    | (N = 67)    | (N = 62)     | (N = 14)   |
| Central Nervous System     | 8 (5.3%)     | 2 (2.99%)   | 6 (9.68%)    | 0 (0%)     |
| Colon                      | 66 (43.71%)  | 35 (52.24%) | 23 (37.1%)   | 5 (35.71%) |
| Gynecological              | 32 (21.19%)  | 9 (13.43%)  | 15 (24.19%)  | 3 (21.43%) |
| Other gastrointestinal     | 23 (15.23%)  | 14 (20.9%)  | 9 (14.52%)   | 0 (0%)     |
| Other non responsive       | 11 (7.28%)   | 2 (2.99%)   | 4 (6.45%)    | 5 (35.71%) |
| Pancreas and biliary tract | 11 (7.28%)   | 5 (7.46%)   | 5 (8.06%)    | 1 (7.14%)  |

**Table S3.** LIPI c-index for OS and PFS prediction.

|                       | OS   | PFS  |
|-----------------------|------|------|
| Univariate analysis   | 0.65 | 0.59 |
| Multivariate analysis | 0.74 | 0.66 |

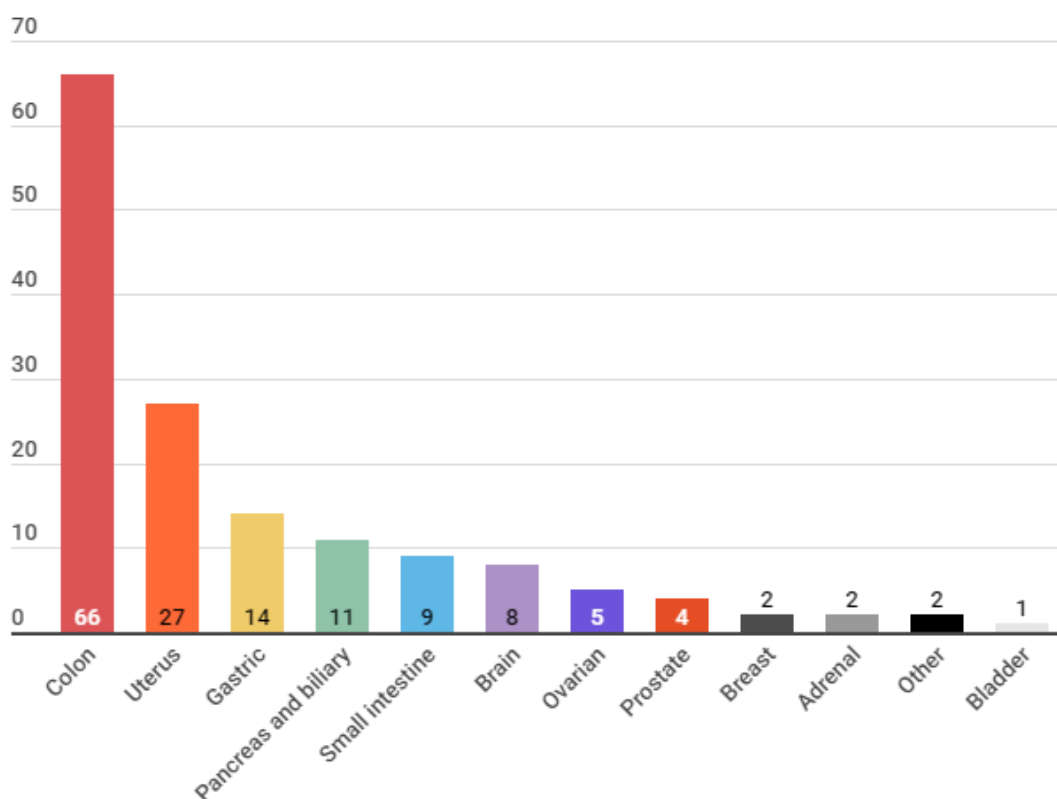

**Figure S1.** Distribution of tumor types in the study population ( $n = 151$ ).

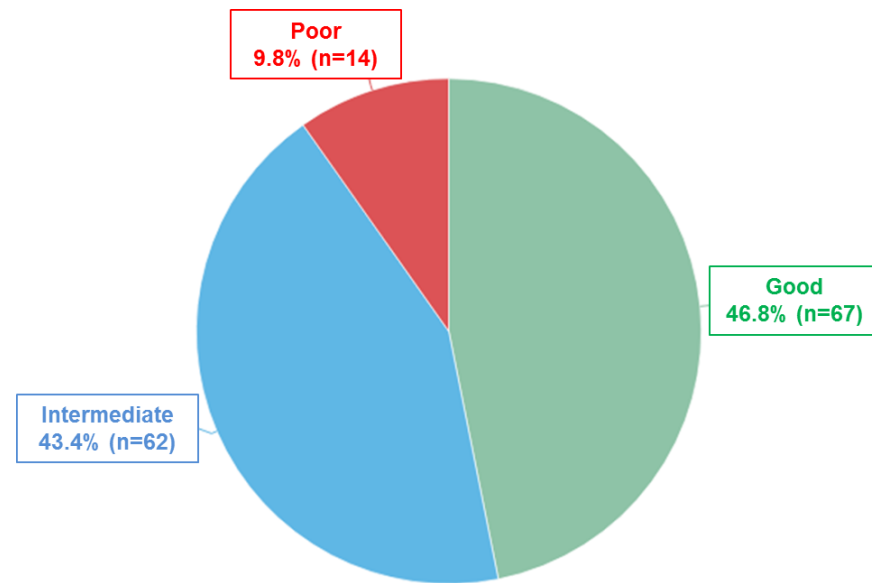

**Figure S2.** Distribution of the LIPI groups in the study population.
